# Supplementary material
Source: publisher site journal article supplement (https://www.dovepress.com/get_supplementary_file.php?f=459418.docx)
Supplement: Supplementary file 1 [file get_supplementary_file.php]

**Table S1 Main information of the datasets included in this study.**

| Datasets | Cancer group (n) | Normal control (n) | Platform | Country | Contributor(s) |
| --- | --- | --- | --- | --- | --- |
| GSE10971 | 13 | 24 | GPL570 | Canada | Tone AA, et al1. |
| GSE119054 | 6 | 3 | GPL19615 | China | Yong Z2 |
| GSE14407 | 12 | 12 | GPL570 | USA | Bowen NJ, et al3. |
| GSE15578 | 4 | 6 | GPL570 | USA | Pejovic T4 |
| GSE18520 | 53 | 10 | GPL570 | USA | Birrer MJ5 |
| GSE27651 | 35 | 6 | GPL570 | USA | Wong K6 |
| GSE38666 | 18 | 12 | GPL570 | USA | Lili LN, et al7. |
| GSE54388 | 16 | 6 | GPL570 | USA | Yeung T, et al8. |
| GSE66957 | 57 | 12 | GPL15048 | USA | Marchion DC* |
| GSE69428 | 10 | 10 | GPL570 | USA | Yamamoto Y, et al9. |
| GSE69429 | 12 | 6 | GPL5175 | USA | Yamamoto Y, et al9. |
| TCGA-GETx | 379 | 88 | - | - | - |
| Total | 615 | 195 |  |  |  |

Note: *: citation missing

References

1. Tone AA, Begley H, Sharma M, et al. Gene expression profiles of luteal phase fallopian tube epithelium from BRCA mutation carriers resemble high-grade serous carcinoma. *Clin Cancer Res*. Jul 1 2008;14(13):4067-78. doi:10.1158/1078-0432.CCR-07-4959

2. Dong S, Wang R, Wang H, et al. HOXD-AS1 promotes the epithelial to mesenchymal transition of ovarian cancer cells by regulating miR-186-5p and PIK3R3. *J Exp Clin Cancer Res*. Mar 1 2019;38(1):110. doi:10.1186/s13046-019-1103-5

3. Bowen NJ, Walker LD, Matyunina LV, et al. Gene expression profiling supports the hypothesis that human ovarian surface epithelia are multipotent and capable of serving as ovarian cancer initiating cells. *BMC Med Genomics*. Dec 29 2009;2:71. doi:10.1186/1755-8794-2-71

4. Pejovic T, Pande NT, Mori M, et al. Expression profiling of the ovarian surface kinome reveals candidate genes for early neoplastic changes. *Transl Oncol*. Dec 2009;2(4):341-9. doi:10.1593/tlo.09199

5. Mok SC, Bonome T, Vathipadiekal V, et al. A gene signature predictive for outcome in advanced ovarian cancer identifies a survival factor: microfibril-associated glycoprotein 2. *Cancer Cell*. Dec 8 2009;16(6):521-32. doi:10.1016/j.ccr.2009.10.018

6. King ER, Tung CS, Tsang YT, et al. The anterior gradient homolog 3 (AGR3) gene is associated with differentiation and survival in ovarian cancer. *Am J Surg Pathol*. Jun 2011;35(6):904-12. doi:10.1097/PAS.0b013e318212ae22

7. Huang C, Clayton EA, Matyunina LV, et al. Machine learning predicts individual cancer patient responses to therapeutic drugs with high accuracy. *Sci Rep*. Nov 6 2018;8(1):16444. doi:10.1038/s41598-018-34753-5

8. Yeung TL, Leung CS, Wong KK, et al. ELF3 is a negative regulator of epithelial-mesenchymal transition in ovarian cancer cells. *Oncotarget*. Mar 7 2017;8(10):16951-16963. doi:10.18632/oncotarget.15208

9. Yamamoto Y, Ning G, Howitt BE, et al. In vitro and in vivo correlates of physiological and neoplastic human Fallopian tube stem cells. *J Pathol*. Mar 2016;238(4):519-530. doi:10.1002/path.4649
